# Supplementary material for: High expression of UNC5B enhances tumor proliferation, increases metastasis, and worsens prognosis in breast cancer
Source: publisher site journal article supplement (doi:10.18632/aging.103639), 2020-08-27
Supplement: Supplementary file [file aging-v12i17-103639-supplementary-material-SD1.pdf]

SUPPLEMENTARY FIGURES

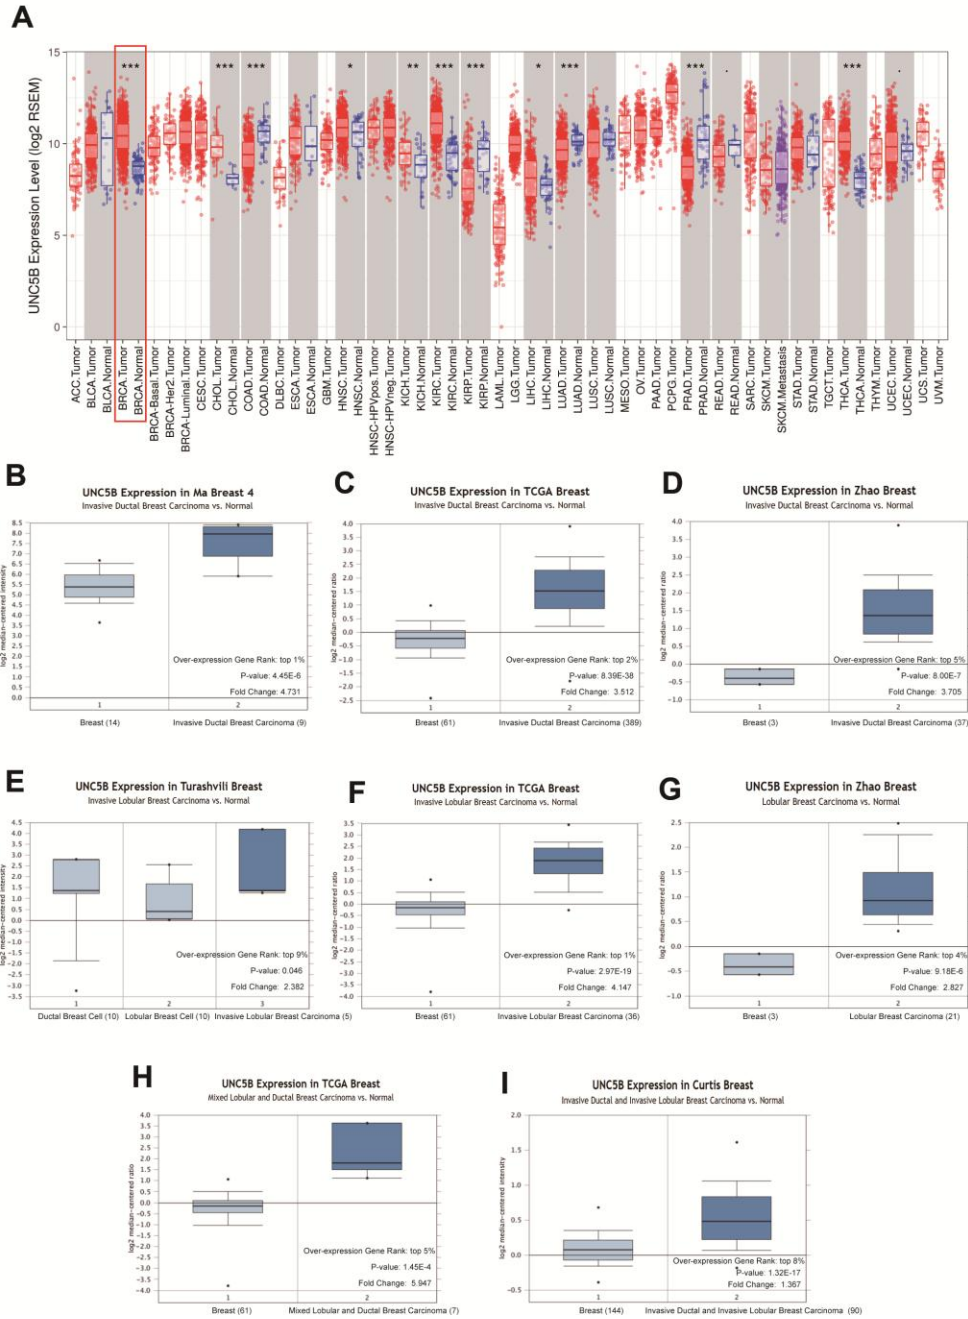

**Supplementary Figure 1. UNC5B mRNA expression is upregulated in breast cancer (TIMER and ONCOMINE).** (A) UNC5B mRNA expression levels between tumor tissues and adjacent normal tissues in 32 cancer types from TCGA. (B–D) UNC5B mRNA expression levels in invasive ductal breast carcinoma compared with normal breast tissues. (E–G) UNC5B mRNA expression levels in lobular breast carcinoma compared with normal breast tissues. (H, I) UNC5B mRNA expression levels in mixed lobular and ductal breast carcinoma compared with normal breast tissues. Data shown in Figure S1B-I are over-expression gene rank, related *p*-value, and fold change generated by OncoPrint. \*, *p* < 0.05; \*\*, *p* < 0.01; \*\*\*, *p* < 0.001.

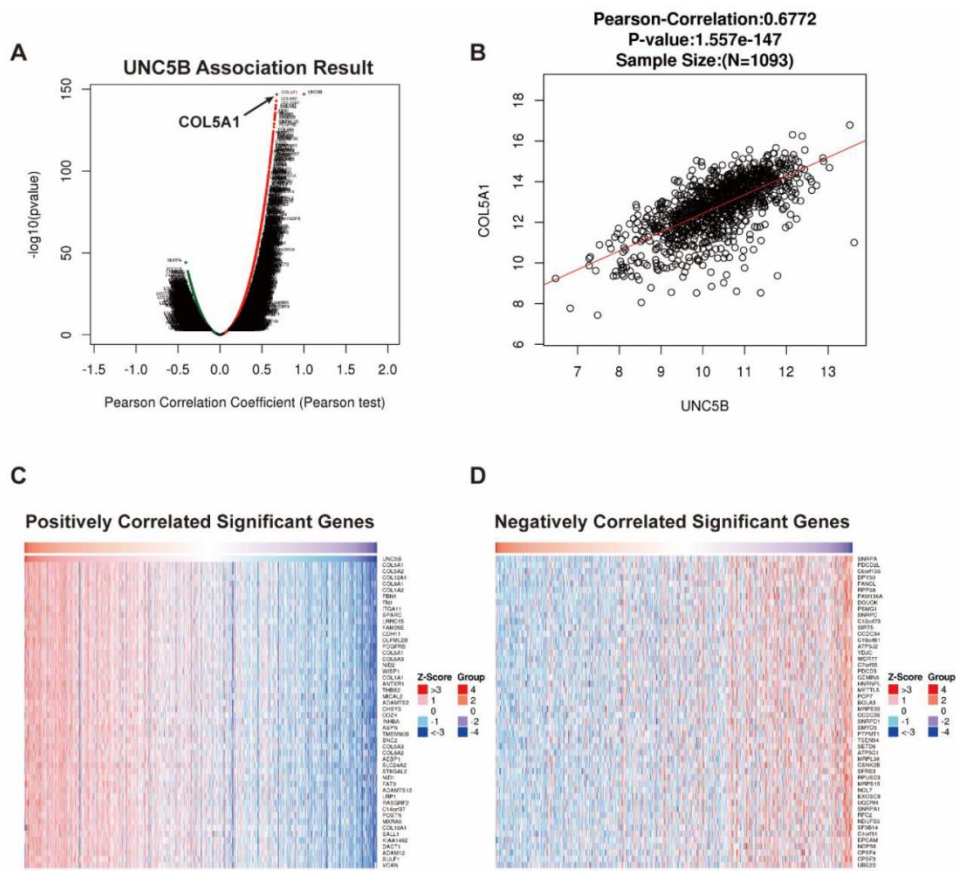

**Supplementary Figure 2. Differentially expressed genes associated with UNC5B in breast cancer (LinkedOmics).** (A) Volcano plot showing the relation of UNC5B to differentially expressed genes in breast cancer. (B) Pearson correlation between the expression of UNC5B and COL5A1 in breast cancer. (C, D) Heat maps showing the top 50 genes positively and negatively correlated with UNC5B in breast cancer.
