# Supplementary material for: High expression of UNC5B enhances tumor proliferation, increases metastasis, and worsens prognosis in breast cancer
Source: publisher site journal article supplement (doi:10.18632/aging.103639), 2020-08-27
Supplement: Supplementary file [file aging-v12i17-103639-supplementary-material-SD2.pdf]

## SUPPLEMENTARY TABLE

**Supplementary Table 1. The characteristics of UNC5B-neighboring gene alterations in breast cancer (cBioPortal).**

| <b>Gene Symbol</b> | <b>Amplification</b> | <b>Mutation</b> | <b>Homozygous Deletion</b> | <b>Total Alteration</b> |
|--------------------|----------------------|-----------------|----------------------------|-------------------------|
| UNC5B              | 10.5                 | 0.8             | 0                          | 11.0                    |
| DAPK1              | 4.6                  | 0.8             | 0                          | 5.5                     |
| DAPK3              | 0                    | 0               | 7.6                        | 7.6                     |
| FRS2               | 4.2                  | 0               | 0                          | 4.2                     |
| FYN                | 4.6                  | 0               | 0.8                        | 5.5                     |
| GRB2               | 8.4                  | 0               | 0.4                        | 8.9                     |
| KIRREL1            | 5.9                  | 1.7             | 1.7                        | 9.3                     |
| NPHS1              | 2.5                  | 1.3             | 10.5                       | 14.3                    |
| NPHS2              | 9.7                  | 1.3             | 0                          | 10.5                    |
| NTN3               | 1.3                  | 0               | 4.6                        | 5.9                     |
| NTN4               | 4.6                  | 0.4             | 0                          | 5.1                     |
| NTNG1              | 2.5                  | 0.8             | 0.4                        | 3.8                     |
| PIK3CA             | 2.5                  | 32.1            | 0                          | 32.5                    |
| PIK3CD             | 0                    | 0.8             | 1.7                        | 2.5                     |
| PIK3CG             | 0.4                  | 1.3             | 0.8                        | 2.5                     |
| PIK3R1             | 7.2                  | 1.7             | 0.8                        | 9.3                     |
| RAC1               | 3.4                  | 0               | 0.8                        | 4.2                     |
| RAC2               | 0                    | 0               | 3                          | 3                       |
| RHOU               | 11                   | 0               | 0                          | 11                      |
| SDC2               | 12.7                 | 0.4             | 0                          | 13.1                    |
| UNC5A              | 1.3                  | 0               | 1.3                        | 2.5                     |
